# Supplementary material
Source: PubMed Central journal article supplement (PMC3116209)
Supplement: supp_data.pdf [file supp_data.pdf]

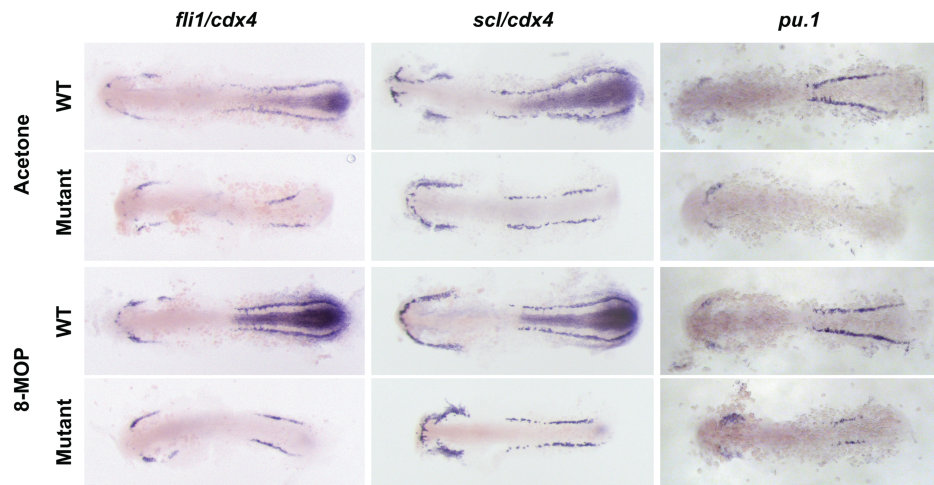

**SUPPLEMENTAL FIG. S1.** The effect of 8-MOP on *fli1*, *scl*, and *pu.1* expression in the WT and *cdx4*-mutant embryos. 8-MOP does not change the expression pattern of mesodermal genes *fli1*, *scl*, and *pu.1* in WT embryos. In *cdx4*-mutant embryos, however, *pu.1* expression is rescued in the posterior lateral mesoderm when 8-MOP is applied. WT, wild type; 8-MOP, 8-methoxypsoralen.

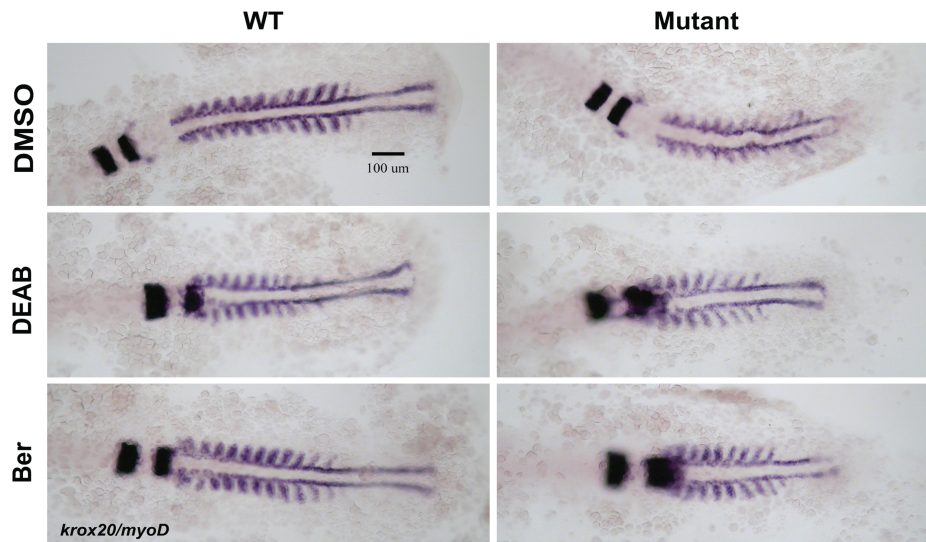

**SUPPLEMENTAL FIG. S2.** *krox20-myod* expression in the WT and *cdx4*-mutant embryos. DEAB- and bergapten-treated embryos lose the gap between *krox-20* and *myoD* regardless of their genotype. DEAB, 4-diethylamino benzaldehyde; Ber, bergapten.

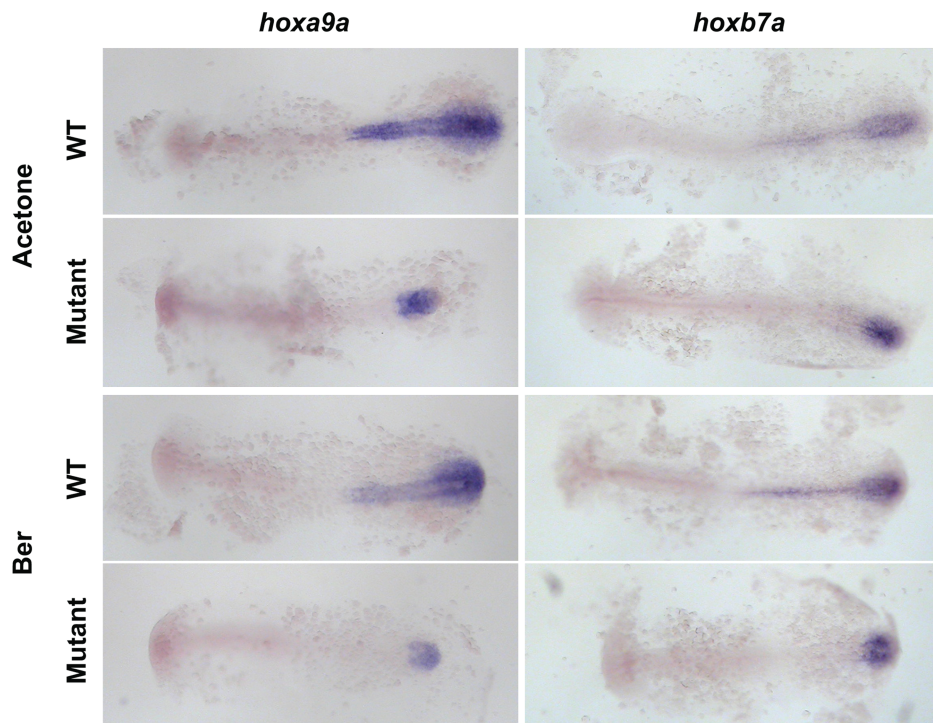

SUPPLEMENTAL FIG. S3. Bergapten does not affect the expression pattern of *hoxa9a* and *hoxb7a* in the *cdx4*-mutant embryos.
